# Supplementary material for: Identification of Three Novel PmGRI1 Genomic Resistance Islands and One Multidrug Resistant Hybrid Structure of Tn7-like Transposon and PmGRI1 in Proteus mirabilis
Source: MDPI journal article supplement (doi:10.3390/antibiotics10101268), 2021-10-18
Supplement: s1 [file s1]

## Supplementary Material

### Supplementary Table

**Table S1.** Criteria for Antibiotic Susceptibility of *P. mirabilis*.

| antibiotics | Diameter of<br>antibacterial<br>circle | antibiotics<br>content<br>( $\mu$ g/Sheet) | Antibiotic<br>resistance<br>(mm) | Moderately<br>sensitive<br>(mm) | Sensitive<br>(mm) |
|-------------|----------------------------------------|--------------------------------------------|----------------------------------|---------------------------------|-------------------|
| FFC         |                                        | 10                                         | $\leq 13$                        | 14-16                           | $\geq 17$         |
| CAZ         |                                        | 30/20                                      | $\leq 20$                        | /                               | $\geq 21$         |
| ATM         |                                        | 30                                         | $\leq 17$                        | 18-20                           | $\geq 21$         |
| LEV         |                                        | 5                                          | $\leq 13$                        | 14-17                           | $\geq 18$         |
| NAL         |                                        | 30                                         | $\leq 13$                        | 14-18                           | $\geq 19$         |
| C           |                                        | 30                                         | $\leq 12$                        | 13-17                           | $\geq 18$         |
| AMP         |                                        | 10                                         | $\leq 13$                        | 14-16                           | $\geq 17$         |
| AMC         |                                        | 20/10                                      | $\leq 13$                        | 14-17                           | $\geq 18$         |
| FOX         |                                        | 30                                         | $\leq 14$                        | 15-17                           | $\geq 18$         |
| CTX         |                                        | 30                                         | $\leq 22$                        | 23-25                           | $\geq 26$         |
| IPM         |                                        | 10                                         | $\leq 19$                        | 20-22                           | $\geq 23$         |
| FFC         |                                        | 30                                         | $\leq 14$                        | 14-18                           | $\geq 19$         |
| CIP         |                                        | 5                                          | $\leq 15$                        | 16-20                           | $\geq 21$         |
| SPT         |                                        | 100                                        | $\leq 10$                        | 11-13                           | $\geq 14$         |
| CN          |                                        | 10                                         | $\leq 12$                        | 13-14                           | $\geq 15$         |
| AK          |                                        | 30                                         | $\leq 14$                        | 15-16                           | $\geq 17$         |
| TMP         |                                        | 5                                          | $\leq 10$                        | 11-15                           | $\geq 16$         |
| SUL         |                                        | 300                                        | $\leq 12$                        | 13-16                           | $\geq 17$         |
| SXT         |                                        | 25                                         | $\leq 10$                        | 11-15                           | $\geq 16$         |
| S           |                                        | 30                                         | $\leq 13$                        | 14-17                           | $\geq 18$         |
